# Supplementary material
Source: ML conference proceedings conference paper supplement (https://proceedings.neurips.cc/paper_files/paper/2017/hash/ccbd8ca962b80445df1f7f38c57759f0-Abstract.html)
Supplement: Supplementary file [file ccbd8ca962b80445df1f7f38c57759f0-Supplemental.zip]

---

# Unified representation of tractography and diffusion-weighted MRI data using sparse multidimensional arrays

## SUPPLEMENTARY MATERIAL

---

**Cesar F. Caiafa\***

Department of Psychological and Brain Sciences  
Indiana University (47405) Bloomington, IN, USA  
IAR - CCT La Plata, CONICET / CIC-PBA  
(1894) V. Elisa, ARGENTINA  
ccaiafa@gmail.com

**Olaf Sporns**

Department of Psychological and Brain Sciences  
Indiana University (47405) Bloomington, IN, USA  
osporns@indiana.edu

**Andrew J. Saykin**

Department of Radiology - Indiana University  
School of Medicine. (46202) Indianapolis, IN, USA  
asaykin@iupui.edu

**Franco Pestilli†**

Department of Psychological and Brain Sciences  
Indiana University (47405) Bloomington, IN, USA  
franpest@indiana.edu

## 1 Proofs of the theoretical bound for accuracy and compression factor

In this section, we derive a theoretical bound on the accuracy of LiFE<sub>SD</sub> compared to the original LiFE model (Proposition 3.1) and we theoretically analyze the compression factor associated to the factorized tensor approximation (Proposition 3.2). Hereafter, we assume a given connectome having  $N_f$  fascicles, each fascicle having a fixed number of  $N_n$  nodes, and where diffusion weighted measurements were taken on  $N_\theta$  gradient directions with a gradient strength  $b$ .

*Proof of Proposition 3.1:* The error in modeling the diffusion signal for a particular voxel  $v$ , fascicle  $f$  and gradient direction  $\theta$  is given by:

$$\Delta_{\mathbf{O}}(\theta) = |\mathbf{O}_f(\theta) - \mathbf{D}(\theta, a)|, \quad (\text{S1})$$

where  $\mathbf{O}_f(\theta)$  is the orientation distribution function as defined in equation (2.3) (we avoided making reference to the voxel  $v$  for clarity) and  $\mathbf{D}(\theta, a)$  is the diffusion signal of atom  $a$

---

\*<http://web.fi.uba.ar/~ccaiafa/Cesar.html>

†<http://www.brain-life.org/plab/>

at gradient direction  $\boldsymbol{\theta} = [\theta_x, \theta_y, \theta_z]^T$ . By defining  $\mathbf{v} = [v_x, v_y, v_z]^T$  and  $\mathbf{v}_a = \mathbf{v} + \boldsymbol{\Delta}_{\mathbf{v}} = [v_x + \Delta_{v_x}, v_y + \Delta_{v_y}, v_z + \Delta_{v_z}]^T$  as the vectors pointing out at the directions of the fascicle  $f$  and its closest dictionary atom  $a$ , respectively (see Fig. 3c), we arrive at:

$$\Delta_{\mathbf{O}}(\boldsymbol{\theta}) = |\Delta_g(\boldsymbol{\theta}) - \frac{1}{N_{\boldsymbol{\theta}}} \sum_{\boldsymbol{\theta}'} \Delta_g(\boldsymbol{\theta}')|, \quad (\text{S2})$$

where  $\Delta_g = |g(\mathbf{v}_1 + \boldsymbol{\Delta}_{\mathbf{v}}, \boldsymbol{\theta}) - g(\mathbf{v}, \boldsymbol{\theta})|$  with  $g(\mathbf{v}, \boldsymbol{\theta}) = e^{-b(\boldsymbol{\theta}^T \mathbf{v})^2}$ . For a sufficiently small error vector  $\boldsymbol{\Delta}_{\mathbf{v}} = [\Delta_{v_x}, \Delta_{v_y}, \Delta_{v_z}]^T$ , we can approximate  $\Delta_g(\boldsymbol{\theta})$  as follows:

$$\Delta_g(\boldsymbol{\theta}) \approx \left| \frac{\partial g(\mathbf{v}, \boldsymbol{\theta})}{\partial v_x} \right| \Delta_{v_x} + \left| \frac{\partial g(\mathbf{v}, \boldsymbol{\theta})}{\partial v_y} \right| \Delta_{v_y} + \left| \frac{\partial g(\mathbf{v}, \boldsymbol{\theta})}{\partial v_z} \right| \Delta_{v_z}, \quad (\text{S3})$$

and, by using the fact that  $|\boldsymbol{\theta}^T \mathbf{v}| \leq 1$ ,  $e^{-b(\boldsymbol{\theta}^T \mathbf{v})^2} \leq 1$ ,  $\Delta_{v_x}, \Delta_{v_y}, \Delta_{v_z} \leq \|\boldsymbol{\Delta}_{\mathbf{v}}\| \leq \frac{\pi}{\sqrt{2}L}$ , and  $\|\boldsymbol{\theta}\|_1 \leq \sqrt{3}\|\boldsymbol{\theta}\|$  in equation (S3), we obtain:  $\Delta_g(\mathbf{v}, \boldsymbol{\theta}) \leq \frac{b\pi\sqrt{6}}{L}$ . Thus, by using this result in equation (S2), we obtain an upper bound for the error of modeling the diffusion signal of one fascicle and at one gradient direction in a voxel:  $\Delta_{\mathbf{O}}(\boldsymbol{\theta}) \leq \frac{2b\pi\sqrt{6}}{L}$ . Finally, by summing up all over the nodes in the connectome, it implies that

$$\|\underline{\mathbf{M}} - \hat{\underline{\mathbf{M}}}\|_F^2 \leq N_f N_n N_{\boldsymbol{\theta}} \left( \frac{2b\pi\sqrt{6}}{L} \right)^2. \quad (\text{S4})$$

□

*Proof of Proposition 3.2:* The memory load necessary to store each fascicle in a sparse matrix  $\mathbf{M}$  is  $3N_{\boldsymbol{\theta}}N_n$ , because using a sparse matrix structure, three numbers are required for each node, i.e., the row-column indices plus the entry value. Thus the storage cost of  $\mathbf{M}$  is:

$$C(\mathbf{M}) = \mathcal{O}(3N_n N_{\boldsymbol{\theta}} N_f). \quad (\text{S5})$$

Conversely, storing fascicles in the LiFE<sub>SD</sub> model requires  $4N_n$  values per fascicle plus the dictionary matrix (i.e., the set of the non-zero entries and their locations within the tensor  $\underline{\Phi}$  plus matrix  $\mathbf{D}$ ). Thus, the amount of memory required in the LiFE<sub>SD</sub> model is:

$$C(\hat{\underline{\mathbf{M}}}) = \mathcal{O}(4N_n N_f + N_{\boldsymbol{\theta}} N_a), \quad (\text{S6})$$

where  $N_{\boldsymbol{\theta}} N_a$  is the storage associated with the dictionary matrix  $\mathbf{D} \in \mathbb{R}^{N_{\boldsymbol{\theta}} \times N_a}$ . Finally, by taking the ratio of equations (S5) and (S6), we arrive at the expression of the compression factor as shown in equation (3.7). □
